1                   **Classification: Biological Science – Agricultural Sciences**

2  
3                   **A novel antimicrobial alternative of microbiota metabolic product deoxycholic**  
4                   **acid controls chicken necrotic enteritis**

5  
6                   Hong Wang\*, Juan D. Latorre\*, Mohit Bansal \*, Bilal Al-Rubaye\*, Guillermo Tellez\*, Billy  
7                   Hargis\*, and Xiaolun Sun\*\*

8  
9                   \*Center of Excellence for Poultry Science, University of Arkansas, 1260 W Maple St.  
10                   Fayetteville AR 727101

11  
12                   *Correspondence:* #To whom correspondence should be addressed: Center of  
13                   Excellence for Poultry Science, 1260 W Maple St. O-409, Fayetteville, AR 72701, Ph:  
14                   479-575-232, Fax: 479-575-7139, xiaoluns@uark.edu

15  
16                   **Keywords:** Microbiome, bile acids, intestinal inflammation, COX, coccidiosis

17  
18  
19  
20  
21

## 22 **Abstract**

23 Necrotic enteritis (NE) caused by *Clostridium perfringens* infection has reemerged as a  
24 prevalent poultry disease worldwide due to reduced usage of prophylactic antibiotics. The  
25 lack of alternative antimicrobial strategies to control this disease is mainly due to limited  
26 insight into NE pathogenesis, microbiome relationships, and host responses. Here we  
27 reported that the metabolic byproduct of microbial metabolism of bile acids to deoxycholic  
28 acid (DCA), at as low as 50  $\mu$ M, inhibited 82.8% of *C. perfringens* growth in Tryptic Soy  
29 Broth ( $P < 0.05$ ). Sequential *Eimeria maxima* and *C. perfringens* challenge strongly  
30 induced NE, severe intestinal inflammation, and body weight (BW) loss in broiler chickens.  
31 These negative effects were diminished by 1.5 g/kg DCA diet. At the cellular level, DCA  
32 alleviated NE-associated ileal epithelial death and lamina propria immune cell apoptosis.  
33 Interestingly, DCA reduced *C. perfringens* invasion into villi without significantly altering  
34 the bacterial luminal colonization. Molecular analysis showed that DCA reduced  
35 inflammatory mediators of *Infy*, *Litaf* (*Tnfa*), *Il1 $\beta$* , and *Mmp9* mRNA accumulation in ileal  
36 tissue. Mechanically, *C. perfringens* induced elevated expression of inflammatory  
37 cytokines of *Infy*, *Litaf*, and *Ptgs2* (COX-2 gene) in chicken splenocytes. Inhibiting the  
38 COX signaling by aspirin attenuated INF $\gamma$ - or TNF $\alpha$ -induced inflammatory response in  
39 the splenocytes. Consistently, chickens fed 0.12 g/kg aspirin diet resisted against NE-  
40 induced BW loss, ileal inflammation, and villus apoptosis. In conclusion, microbial  
41 metabolic product DCA prevents NE-induced BW loss and ileal inflammation through  
42 curbing inflammatory response. These novel findings could serve as a stepping-stone for  
43 developing next generation antimicrobial alternatives against NE.

45 **Significance Statement**

46

47 Widespread antimicrobial resistance has become a serious challenge to both agricultural  
48 and healthcare industries. Withdrawing antimicrobials without effective alternatives  
49 exacerbates poultry productivity loss at billions of dollars every year, caused by intestinal  
50 diseases, such as coccidiosis- and *C. perfringens*-induced NE. This study used the  
51 endogenous microbial metabolic secondary bile acid product DCA to control NE and to  
52 improve chicken growth performance through modulating host response. These findings  
53 have opened new avenues for developing next-generation antimicrobial free regimens.

## 54 Introduction

55

56 Antimicrobial resistance is one of the emerging challenges requiring immediate  
57 and sustainable counter-actions from agriculture to healthcare (1). Increasing  
58 antimicrobial resistance has caused the emergence of multiple drug-resistant microbes  
59 or “superbugs”. Recently, a “superbug” of an *Escherichia coli* strain resistant to the last  
60 resort antibiotic, Colistin, was reported in USA (2). Overuse of antimicrobial agents in  
61 medical and agricultural practice is contributing to exacerbating the episodes of emerging  
62 antimicrobial resistant microbes (1). Withdrawing antimicrobials in poultry production,  
63 however, has caused new problems for the poultry industry by reducing production  
64 efficiency and increasing diseases, such as *Eimeria maxima*- and *Clostridium*  
65 *perfringens*-induced necrotic enteritis (NE) (3). Clinical signs of NE include watery to  
66 bloody (dark) diarrhea, severe depression, decreased appetite, closed eyes, and ruffled  
67 feathers. Dissection of dead or severely ill birds shows that the intestine is often distended  
68 with gas, very friable, and contains a foul-smelling brown fluid, with clearly visible necrotic  
69 lesions (4). Although progress has been made toward understanding risk factors  
70 influencing the outcome of NE such as *C. perfringens* virulence, coccidiosis, and feed (5),  
71 few effective non-antimicrobial strategies are available.

72 The human and animal intestine harbors up to trillions of microbes and this  
73 intestinal microbiota regulates various host functions such as the intestinal barrier,  
74 nutrition and immune homeostasis (6-8). The enteric microbiota regulates granulocytosis  
75 and neonatal response to *Escherichia coli* K1 and *Klebsiella pneumoniae* sepsis (9),  
76 suggesting the key role of the microbiota in protecting the host against systemic infection.

77 At the gut level, fecal transplantation was reported decades ago to prevent *Salmonella*  
78 *infantis* chicken infection (10). More recently, microbiota transplantation has shown  
79 tremendous success against recurrent *Clostridium difficile* infection (11) and *Clostridium*  
80 *scindens* metabolizing secondary bile acids have been shown to inhibit *C. difficile*  
81 infection (12). Bile acids synthesized in the liver are released in the intestine and  
82 metabolized by gut microbiota into final forms of secondary bile acids (13). Bile acids,  
83 particularly the secondary bile acid DCA, are associated with a variety of chronic  
84 diseases, such as obesity, diabetes, and colorectal tumorigenesis (14, 15). Recently, we  
85 found that mouse anaerobes and their metabolic product DCA prevented and treated  
86 *Campylobacter jejuni*-induced colitis in germ-free mice through attenuating host  
87 inflammatory signaling pathways (16).

88 Cyclooxygenases (COX)-catalyzed prostanoids regulate various activities  
89 including cell proliferation, apoptosis and migration (17), gastrointestinal secretion (18),  
90 body temperature (19), inflammation (20), and pain sensation (21). COX-1 and COX-3  
91 (gene *Ptgs1*, alternative splicing) constitutively expressed are important for intestinal  
92 integrity. Inducible COX-2 (*Ptgs2*) activity is associated with various inflammatory  
93 diseases including inflammatory bowel disease (22) and radiation-induced small bowel  
94 injury (23). COX-2 increases gut barrier permeability and bacterial translocation across  
95 the intestinal barrier (24, 25). Paradoxically, COX-2 enhances inflammation resolution  
96 through prostaglandin D<sub>2</sub> (26). Although non-selective COX inhibitor aspirin is used to  
97 prevent various chronic diseases, it inflicts intestinal inflammation to the healthy intestine  
98 (27).

99           Currently, limited knowledge is available on the relationship between NE  
100 pathogenesis, the microbiome, and host inflammatory response. Here, we hypothesize  
101 that the microbiota metabolic product DCA attenuates NE. Our findings demonstrated that  
102 DCA decreases NE-induced BW loss, intestinal inflammation, *C. perfringens* invasion,  
103 and villus death. Blocking the inflammatory downstream target COX signaling pathways  
104 by aspirin reduces NE-induced intestinal inflammation. These findings could serve as a  
105 stepping-stone for the development of new antimicrobial free prevention and therapeutic  
106 strategies against NE.

## 107 **Results**

108

### 109 **DCA prevents *C. perfringens* in vitro growth**

110 We previously reported that the secondary bile acid DCA prevents and treats *C.*  
111 *jejuni*-induced intestinal inflammation in germ-free mice (28). This secondary bile acid  
112 also inhibits *C. difficile* *in vitro* growth (12). Since *C. difficile* and *C. perfringens* are in the  
113 same genus, we reasoned that DCA would prevent *C. perfringens* growth. To test this  
114 hypothesis, we implemented *in vitro* inhibition experiments, in which *C. perfringens* was  
115 inoculated in Tryptic Soy Broth (TSB) with sodium thioglycollate under anaerobic  
116 condition. The TSB was also added with various concentrations of bile acids, including  
117 conjugated primary bile acid taurocholic acid (TCA), primary bile acid cholic acid (CA),  
118 and secondary bile acid DCA. Notably, DCA inhibited *C. perfringens* growth at 0.01 (-  
119 33.8%) and 0.05 mM (-82.8%, clear broth), respectively, compared to control, while TCA  
120 (-16.4%) and CA (-8.2%) barely prevented the bacterial growth (cloudy broth) even at 0.2  
121 mM (Figure 1A and B). We then examined if other secondary bile acids were also  
122 bacteriostatic in TSB. Interestingly, *C. perfringens* growth was only mildly inhibited by  
123 lithocholic acid (LCA; -22.6 and -23.8%) and ursodeoxycholic acid (UDCA; -10.0 and -  
124 25.3%) at 0.2 and 1 mM, respectively (Figure 1C and D). These results suggest that the  
125 secondary bile acid DCA effectively curbs *C. perfringens* *in vitro* growth.

126

### 127 **DCA prevented NE-induced productivity loss**

128 To further address whether DCA reduces coccidia *E. maxima*- and *C. perfringens*-  
129 induced necrotic enteritis (NE) in birds, we fed day-old broiler chicks with 1.5 g/kg CA or

130 DCA diets and growth performance of body weight (BW) gain were measured. To induce  
131 NE, the birds were infected with 20,000 sporulated oocysts/bird *E. maxima* at 18 days of  
132 age and then infected with  $10^9$  CFU/bird *C. perfringens* at 23 and 24 days of age. Notably,  
133 DCA (solid black bar) but not CA (straight line bar) diet promoted bird daily BW gain during  
134 0-18 days of age compared to birds fed control diets (open bar, Figure 2 A). Body weight  
135 gain was impaired in birds infected with *E. maxima* (Em) at 18-23 days of age (coccidiosis  
136 phase). Subsequent *C. perfringens* infection further drove NE control birds (dotted bar)  
137 into BW loss at 23-26 days of age (NE phase). Remarkably, DCA prevented productivity  
138 loss at coccidiosis and NE phases compared to the NE control birds. Interestingly, the  
139 primary bile acid CA diet attenuated body weight loss at NE phase but failed at coccidiosis  
140 phase compared to the NE control birds.

141

#### 142 **DCA prevented NE-induced histopathology**

143 Coccidiosis and NE induce severe intestinal inflammation. To have a thorough  
144 insight into DCA impact on NE pathogenesis, we collected intestinal tissue at upper ileum  
145 as Swiss rolls, processed with H&E staining, and performed histopathology analysis.  
146 Notably, *E. maxima* infection induced severe intestinal inflammation (ileitis) as seen by  
147 immune cell infiltration into lamina propria, crypt hyperplasia, and mild villus height  
148 shortening compared to uninfected birds (Figure 2B). Furthermore, NE control birds  
149 suffered worse ileitis as seen by necrosis and fusion of villi and crypt, massive immune  
150 cell infiltration, and severe villus shortening. Notably, DCA diet dramatically attenuated  
151 NE-induced ileitis and histopathology score (Figure 2B and C), while CA reduced NE-  
152 induced ileitis and histopathology score. These results indicate that DCA promotes growth



153 performance and resists against coccidiosis- and NE-induced BW loss and severe ileitis  
154 and histopathology.

155

### 156 **DCA attenuates NE-induced intestinal cell necrosis and apoptosis**

157 Healthy intestinal epithelial cells have polarity (29) and their nuclei are located  
158 toward the basal membrane (30), while stressed dying (apoptosis or necrosis) cells lose  
159 polarity (31) and their nuclei disperse from basal to apical membranes (32). We then  
160 sought to examine whether cell death is relevant in DCA-attenuating NE-induced ileitis.  
161 Since it is difficult to find reliable chicken antibodies to detect apoptosis or necrosis in  
162 chicken histology slides, we first resorted to classical histological analysis under high  
163 magnification. Consistently, the epithelial nuclei (dark blue) in healthy control bird villi were  
164 distributed close to the basal membrane (at the right side of the yellow dash line, Figure  
165 3A lower panel left). In contrast, the nuclei in inflamed villi epithelial cells of Em and NE  
166 birds were scattered from basal to the apical membranes, indicating epithelial cell death  
167 in villi of those birds. Notably, the DCA diet prevented epithelial cell nucleus translocation  
168 to apical side, suggesting cell death reduction. To further characterize the villus cell death,  
169 we used terminal deoxynucleotidyl transferase (TdT) dUTP Nick-End Labeling (TUNNEL)  
170 assay, which detects later stage of cell apoptosis. Consistent with histopathology results,  
171 coccidiosis and NE induced massive scatter (Em birds) or concentrated (NE birds)  
172 apoptosis cells (green dots) in villus lamina propria, however, cellular apoptosis was  
173 attenuated in the DCA treatment. These results indicate that DCA resists against  
174 coccidiosis- and NE-induced cell death in villus epithelial and lamina propria cells.

175

176 **DCA reduces *C. perfringens* invasion and NE-induced inflammatory response**

177         Given DCA inhibited *C. perfringens* growth *in vitro*, it is logic to reason that DCA  
178 might also reduce *C. perfringens* intestinal overgrowth in NE birds. To examine this  
179 possibility, we collected ileal digesta extracted total DNA and measured *C. perfringens*  
180 colonization level in the intestinal lumen using real-time PCR of *C. perfringens* 16S rDNA.  
181 Consistently, coccidiosis and NE were associated with increased luminal *C. perfringens*  
182 colonization compared to uninfected birds (Figure 4A). Surprisingly, ileal luminal *C.*  
183 *perfringens* load in DCA birds was not significantly different from NE control birds, while  
184 bird productivity and histopathology were strikingly distinct between the two groups of  
185 birds (Figures 2A-C). We, therefore, reasoned that the pathogen invasion into tissue was  
186 the main driving factors of NE pathogenesis, but not the pathogen luminal colonization  
187 level. Using a fluorescence *in situ* hybridization (FISH) technique, we found that while *C.*  
188 *perfringens* was present deeply in the inflamed villus and crypt lamina propria of NE  
189 control birds, the bacterium was barely detectable in the ileal tissue of DCA birds (Figure  
190 4B). Because DCA reduced *C. perfringens* invasion and intestinal inflammation, we  
191 evaluated the impact of DCA on various proinflammatory mediators in ileal tissue using  
192 Real-Time PCR. Notably, *C. perfringens* strongly induced inflammatory *Infy*, *Litaf* (*Tnfa*),  
193 *Il1 $\beta$* , and *Mmp9* mRNA accumulation in chicken ileal tissue, an effect attenuated by 51,  
194 82, 63 and 93%, respectively, in DCA fed chickens (Figure 4C).

195

196 **COX inhibitor aspirin alleviates *C. perfringens*-induced inflammatory response in**  
197 **splenocytes**

198 Inflammatory events shape intestinal diseases and targeting the inflammatory  
199 response attenuates disease progress such as inflammatory bowel disease (33) and  
200 campylobacteriosis (34). To dissect how the host inflammatory response is involved in  
201 NE-induced ileitis, we then used a primary chicken splenocyte cell culture system (35).  
202 After isolation from 28-day old chickens, the splenocytes were infected with *C. perfringens*  
203 (MOI 100) for 4 hours. Notably, *C. perfringens* increased inflammatory mediators of *Infy*,  
204 *Litaf*, *Il1 $\beta$* , *Mmp9* and *Ptgs2* (protein COX-2) mRNA accumulation by 1.54, 1.69, 76.47,  
205 1.72 and 8.65 folds, respectively, compared to uninfected splenocytes (Figure 5A). COX-  
206 2 are important mediators in the inflammatory response (22). We then used COX inhibitor  
207 aspirin towards *C. perfringens*-infected chicken splenocytes, but no inhibition of  
208 inflammatory gene expression was observed (data not shown). We then used  
209 inflammatory cytokines of recombinant murine INF $\gamma$  and TNF $\alpha$  to challenge splenocytes  
210 in the presence of aspirin. Remarkably, aspirin reduced INF $\gamma$ -induced inflammatory gene  
211 expression of *Infy*, *Litaf*, *Il1 $\beta$* , and *Mmp9* by 41, 27, 42, and 45%, respectively (Figure 5B).  
212 Similarly, aspirin reduced TNF $\alpha$ -induced inflammatory gene expression of *Infy*, *Litaf*, and  
213 *Mmp9* by 49, 53, and 27%, respectively (Figure 5C). These data indicate that *C.*  
214 *perfringens* induces inflammatory cytokines and COX-2 and inhibiting COX signaling by  
215 aspirin reduces the cytokine-induced inflammatory response, suggesting that aspirin  
216 poses protection potential against NE detrimental effects.

217

### 218 **Aspirin attenuates NE-induced productivity loss, histopathology and apoptosis**

219 To functionally assess the protective effect of aspirin against NE-induced ileitis,  
220 broiler chickens fed with 0.12 g/kg aspirin diet (ASP) were infected with *E. maxima* and

221 *C. perfringens* as describe before. Interestingly, ASP birds grew slower compared to  
222 control diet birds during 0-18 days of age (Figure 6A). This is because aspirin inhibit all  
223 COX isoforms and COX-1 and -3 are important for intestinal homeostats and growth.  
224 Notably, ASP attenuated NE-induced BW loss by 60% in NE phase of 23-26 days of age,  
225 while no difference between ASP and NE birds in coccidiosis phase of 18-23 days of age.  
226 To further dissect the underlying cellular mechanism, we then used a histopathology  
227 analysis. Consistently, ASP attenuated NE-induced intestinal inflammation and  
228 histopathological score (Figures 6B and C). ASP also reduced NE-induced immune cell  
229 apoptosis in villus lamina propria (Figure 6D). These data suggest that aspirin attenuates  
230 NE-induced BW loss, intestinal inflammatory response, and villus cell death.

231

232

## 233 Discussion

234

235 Although NE has reemerged as a prevalent poultry disease worldwide in the antimicrobial  
236 free era (3), the lack of comprehensive molecular mechanism insight into NE severely  
237 hinders the development of antimicrobial alternatives to control this disease (36). Many  
238 virulent factors of *Eimeria* and *C. perfringens* are identified but few findings are effective  
239 to control NE in poultry production (5, 37), suggesting that we have overlooked important  
240 players/factors in NE pathogenesis, such as microbiome and host response. Here we  
241 reported that microbiota metabolic product DCA dramatically attenuates chicken NE by  
242 reducing chicken inflammatory response. These new findings pave the path for exploring  
243 novel antimicrobial alternatives to control NE.

244 It is a relatively new concept to manipulate microbiota and its metabolic products  
245 against infectious diseases. Fecal transplantation was used in chickens decades ago to  
246 prevent *S. infantis* infection (10). Microbiome plays an important role in susceptibility to  
247 *C. difficile* infection (38). Anaerobe *C. scindens*-transformed secondary bile acids prevent  
248 *C. difficile* germination and growth (12). Lithocholic acid and DCA but not primary bile  
249 acid CA inhibit *C. difficile* vegetable growth and toxin production (12, 39). However,  
250 whether secondary bile acids prevent or treat *C. difficile* infection in human or animal  
251 models is still unknown. We recently found that orally gavaging DCA attenuates *C. jejuni*-  
252 induced intestinal inflammation in germ-free mice (28). Based on the knowledge, we  
253 reasoned that DCA may prevent *E. maxima*- and *C. perfringens*-induced chicken NE.  
254 Indeed, dietary DCA but not CA prevents NE and its associated productivity loss. The  
255 reduction of ileitis is coupled with reduced *C. perfringens* invasion and intestinal

256 inflammation and cell death. Intriguingly, DCA failed to significantly reduce *C. perfringens*  
257 ileal colonization, suggesting that the mechanism of DCA action is independent of  
258 intestinal luminal colonization exclusion and is possible through modulating inflammation.

259         At the cellular level, the intestinal tract of NE-inflicted birds displays severe small  
260 intestinal inflammation, showing massive immune cells infiltration into lamina propria,  
261 villus breakdown, and crypt hyperplasia (40, 41). Intestinal inflammation is critical to clear  
262 invaded microbes and to resolve inflammation, while overzealous inflammation causes  
263 more bacterial invasion and further collateral damage and inflammation (42). Infectious  
264 bacteria often hijack the inflammatory pathways to gain survival and invasion advantage.  
265 For example, *Salmonella* Typhimurium induces extensive intestinal inflammation and  
266 thrives on the inflammation (43). Consistent with this “over-inflammation” model, NE birds  
267 with severe intestinal inflammation shows extensive BW loss, villus cell death, and *C.*  
268 *perfringens* invasion. Conversely, DCA attenuating ileitis improves the growth  
269 performance and dramatically reduces the NE pathology. Consequently, blocking  
270 downstream inflammatory COX signaling by aspirin alleviates intestinal inflammation,  
271 villus apoptosis and 60% NE-induced BW loss. These findings indicate that DCA inhibiting  
272 inflammatory signaling pathways and targeting them could effectively prevent NE.

273         Altogether, our data reveal that the microbial metabolic product secondary bile acid  
274 DCA attenuates NE, through blunting NE-induced host inflammatory response. These  
275 findings highlight the importance of elucidating the molecular relationship between  
276 infectious pathogen, microbiome, and host response. These discoveries lay the first stone  
277 on using microbiome and host inflammatory response to control NE and other intestinal  
278 diseases.

279

## 280 **Materials and Methods**

281

### 282 **Chicken experiment**

283 All animal protocols were approved by the Institutional Animal Care and Use Committee  
284 of the University of Arkansas at Fayetteville. Cohorts of 13 day-of-age broiler chicks  
285 obtained from Cobb-Vantress (Siloam Springs, AR) were neck-tagged and randomly  
286 placed in floor pens with a controlled age-appropriate environment. The birds were fed a  
287 corn-soybean meal-based starter diet during 0-10 days of age and a grower diet during  
288 11-26 days of age. The basal diet was formulated as described before (44). Treatment  
289 diets were supplemented with 1.5 g/kg CA or DCA or 0.12 g/kg aspirin (all from Alfa  
290 Aesar). Birds were infected with 20,000 sporulated oocytes/bird *E. maxima* at 18 days of  
291 age and  $10^9$ cfu/bird *C. perfringens* at 23 and 24 days of age. Chicken body weight and  
292 feed intake were measured at d 0, 18, 23, and 26 days of age. Bird health status was  
293 monitored daily after the pathogen infection. Birds were sacrificed at 26 days of age. Ileal  
294 tissue and digesta samples were collected for RNA and DNA analysis. Ileal tissue was  
295 also Swiss-rolled for histopathology analysis. Images were acquired using a Nikon TS2  
296 fluorescent microscope. Ileal inflammation was scored by evaluating the degree of lamina  
297 propria immune cell infiltration, villus shortening, edema, necrosis, crypt hyperplasia,  
298 ulceration, and transmural inflammation using a score from 0 to 16.

299

### 300 ***C. perfringens*-induced inflammatory response using primary splenocytes**

301 Splenocytes were isolated similarly to described previously (34). Briefly, chickens at 28  
302 days of age were sacrificed and spleens were resected and homogenized using frosted  
303 glass slides in RPMI 1640 medium supplemented with 2% fetal bovine serum, 2mM L-  
304 glutamine, 50  $\mu$ M 2-mercaptoethanol. After lysed the red blood cells, the collected cells  
305 were plated at  $2 \times 10^6$  cells/well in 6-well plates. The cells were pre-treated with 1.2 mM  
306 aspirin for 45 min. Cells were then challenged with murine INF $\gamma$  (1 $\mu$ g/ml, Pepro Tech),  
307 TNF $\alpha$  (5 ng/ml, Pepro Tech), or *C. perfringens* (multiplicity of infection 100). The cells  
308 were lysed in TRIzol (Invitrogen) at 2 or 4 hours after cytokines or *C. perfringens* treatment,  
309 respectively.

310

### 311 **Real time RT-PCR**

312 Total RNA from ileal tissue or splenocytes was extracted using TRIzol as described  
313 before (28, 45). cDNA was prepared using M-MLV (NE Biolab). mRNA levels of  
314 proinflammatory genes were determined using SYBR Green PCR Master mix (Bio-Rad)  
315 on a Bio-Rad 384-well Real-Time PCR System and normalized to *Gapdh*. Ileal digesta  
316 DNA was extracted as described before (28) and the digesta bacteria were subject to  
317 real-time PCR. The PCR reactions were performed according to the manufacturer's  
318 recommendation. The following gene primers were used:

319 *Cp16S*\_forward: 5'- CAACTTGGGTGCTGCATTCC-3'; *Cp16S* reverse: 5'-  
320 GCCTCAGCGTCAGTTACAG-3'; *Mmp9*\_forward: 5'-CCAAGATGTGCTCACCAAGA-3'  
321 *Mmp9*\_reverse: 5'-CCAATGCCCAACTTCTCAAT-3'; *Litaf* (*Tnfa*)\_forward: 5'-  
322 AGATGGGAAGGGAATGAACC; *Litaf* (*Tnfa*)\_reverse: 5'-  
323 GACGTGTCACGATCATCTGG-3'; *Il1 $\beta$* \_forward: 5'-GCATCAAGGGCTACAAGCTC-3';



324 *Il1*  $\beta$ \_reverse: 5'-CAGGCGGTAGAAGATGAAGC-3'; *Infy*\_forward: 5'-  
325 AGCCGCACATCAAACACATA -3'; *Infy*\_reverse: 5'-TCCTTTTGAAACTCGGAGGA-3';  
326 *Ptgs2*\_forward: 5'-ACCAGCATTTC AACCTTTGC-3'; *Ptgs2*\_reverse: 5'-  
327 CCAGGTTGCTGCTCTACTCC-3'; *Gapdh*\_forward: 5'-GACGTGCAGCAGGAACACTA-  
328 3'; *Gapdh*\_reverse: 5'- CTTGGACTTTGCCAGAGAGG-3'.

329

### 330 **TUNNEL assay**

331 Cell apoptosis in intestinal tissue sections was visualized using TUNNEL assay. Briefly,  
332 ileal tissue sections were deparaffinized with xylene bath for 3 times and rehydrated with  
333 100%, 95%, and 70% ethanol. The tissue was then incubated with TUNNEL solution (5  
334  $\mu$ M Fluorescein-12-dUTP (Enzo Life Sciences), 10  $\mu$ M dATP, 1 mM pH 7.6 Tris-HCl, 0.1  
335 mM EDTA, 1U TdT enzyme (Promega) at 37° C for 90 min. The slides were counter-  
336 stained with DAPI for nucleus visualization. The fluorescent green apoptosis cells were  
337 evaluated and imaged using a Nikon TS2 fluorescent microscopy.

338

### 339 **Fluorescence in situ hybridization (FISH)**

340 *C. perfringens* at ileal tissue sections was visualized using FISH assay similarly as  
341 previously described. Briefly, tissue sections were deparaffinized, hybridized with the  
342 FISH probe, washed, stained with DAPI, and imaged using a Nikon TS2 fluorescent  
343 Microscope system. The FISH probe sequence of Cp85aa18: 5'-  
344 /Cy3/TGGTTGAATGATGATGCC-3' (46) was used to probe the presence of *C.*  
345 *perfringens* similar to a previous report (45). Briefly, deparaffinized, formalin-fixed 5  $\mu$ m  
346 thick sections were incubated for 15 minutes in lysozyme (300,000 Units/ml lysozyme;

347 Sigma-Aldrich) buffer (25 mM Tris pH 7.5, 10 mM EDTA, 585 mM sucrose, and 0.3 mg/ml  
348 sodium taurocholate) at room temperature and hybridized overnight at 46 °C in  
349 hybridization chambers with the oligonucleotide probe (final concentration of 5 ng/μl in a  
350 solution of 30 percent formamide, 0.9 M sodium chloride, 20 mM Tris pH 7.5, and 0.01%  
351 sodium dodecyl sulfate). Tissue sections were washed for 20 minutes at 48 °C in washing  
352 buffer (0.9 M NaCl, 20 mM Tris pH 7.2, 0.1% SDS, 20% Formamide, and 10% Dextran  
353 Sulfate) and once in distilled water for 10 seconds. The slide was stained with DAPI for 2  
354 min and dried at RT, mounted with 50% glycerol. *C. perfringens* in intestinal tissue was  
355 evaluated and imaged using a Nikon TS2 fluorescent microscopy.

356

#### 357 **Bile acid *C. perfringens* inhibition assay**

358 *C. perfringens* in Tryptic Soy Broth (TSB) supplemented with 0.5% sodium thioglycollate,  
359 with added TCA, CA or DCA (0, 0.01, 0.05, 0.1, or 0.2 mM, final concentration) or LCA or  
360 UDCA (0, 0.2, or 1 mM, final concentration) was cultured overnight under anaerobic  
361 conditions. The bacterial growth was monitored by (OD<sub>600nm</sub>) using a  
362 spectrophotometer.

#### 363 **Statistical Analysis**

364 Values are shown as mean ± standard error of the mean as indicated. Differences  
365 between groups were analyzed using the nonparametric Mann–Whitney *U* test performed  
366 using Prism 5.0 software. Experiments were considered statistically significant if *P* values  
367 were <0.05.

368

369

## 370 **Acknowledgement**

371 The authors would like to thank the support from staff at Poultry Health Laboratory and  
372 Feed Mill in Department of Poultry Science at University of Arkansas, Fayetteville. We  
373 also thank P. L. Matsler on helping our histology slides. This research was partially  
374 supported by Arkansas Biosciences Institute grant to X. Sun.

## 375 **References**

376

- 377 1. Neu HC (1992) The crisis in antibiotic resistance. *Science* 257(5073):1064-1073.
- 378 2. McGann P, *et al.* (2016) Escherichia coli Harboring mcr-1 and blaCTX-M on a  
379 Novel IncF Plasmid: First report of mcr-1 in the USA. *Antimicrobial agents and*  
380 *chemotherapy*.
- 381 3. Kaldhusdal M, Benestad SL, & Lovland A (2016) Epidemiologic aspects of necrotic  
382 enteritis in broiler chickens - disease occurrence and production performance.  
383 *Avian pathology : journal of the W.V.P.A* 45(3):271-274.
- 384 4. Timbermont L, Haesebrouck F, Ducatelle R, & Van Immerseel F (2011) Necrotic  
385 enteritis in broilers: an updated review on the pathogenesis. *Avian Pathol*  
386 40(4):341-347.
- 387 5. Prescott JF, Parreira VR, Mehdizadeh Gohari I, Lepp D, & Gong J (2016) The  
388 pathogenesis of necrotic enteritis in chickens: what we know and what we need to  
389 know: a review. *Avian pathology : journal of the W.V.P.A* 45(3):288-294.
- 390 6. Caricilli AM, Castoldi A, & Camara NO (2014) Intestinal barrier: A gentlemen's  
391 agreement between microbiota and immunity. *World J Gastrointest Pathophysiol*  
392 5(1):18-32.
- 393 7. Subramanian S, *et al.* (2014) Persistent gut microbiota immaturity in malnourished  
394 Bangladeshi children. *Nature*.
- 395 8. Belkaid Y & Hand TW (2014) Role of the microbiota in immunity and inflammation.  
396 *Cell* 157(1):121-141.
- 397 9. Deshmukh HS, *et al.* (2014) The microbiota regulates neutrophil homeostasis and  
398 host resistance to Escherichia coli K1 sepsis in neonatal mice. *Nat Med*.
- 399 10. Rantala M & Nurmi E (1973) Prevention of the growth of Salmonella infantis in  
400 chicks by the flora of the alimentary tract of chickens. *British poultry science*  
401 14(6):627-630.
- 402 11. Silverman MS, Davis I, & Pillai DR (2010) Success of self-administered home fecal  
403 transplantation for chronic Clostridium difficile infection. *Clin Gastroenterol Hepatol*  
404 8(5):471-473.
- 405 12. Buffie CG, *et al.* (2015) Precision microbiome reconstitution restores bile acid  
406 mediated resistance to Clostridium difficile. *Nature* 517(7533):205-208.
- 407 13. Ridlon JM, Kang DJ, & Hylemon PB (2006) Bile salt biotransformations by human  
408 intestinal bacteria. *Journal of lipid research* 47(2):241-259.
- 409 14. Ma H & Patti ME (2014) Bile acids, obesity, and the metabolic syndrome. *Best*  
410 *practice & research. Clinical gastroenterology* 28(4):573-583.
- 411 15. Bernstein C, *et al.* (2011) Carcinogenicity of deoxycholate, a secondary bile acid.  
412 *Archives of toxicology* 85(8):863-871.
- 413 16. Sun X, *et al.* (2018) Microbiota-derived Metabolic Factors Reduce  
414 Campylobacteriosis in Mice. *Gastroenterology*. doi: 10.1053/j.gastro.2018.01.042.
- 415 17. Biondi C, *et al.* (2006) Prostaglandin E2 inhibits proliferation and migration of HTR-  
416 8/SVneo cells, a human trophoblast-derived cell line. *Placenta* 27(6-7):592-601.
- 417 18. Dey I, Lejeune M, & Chadee K (2006) Prostaglandin E2 receptor distribution and  
418 function in the gastrointestinal tract. *Br J Pharmacol* 149(6):611-623.

- 419 19. Lazarus M (2006) The differential role of prostaglandin E2 receptors EP3 and EP4  
420 in regulation of fever. *Mol Nutr Food Res* 50(4-5):451-455.
- 421 20. Bos CL, Richel DJ, Ritsema T, Peppelenbosch MP, & Versteeg HH (2004)  
422 Prostanoids and prostanoid receptors in signal transduction. *Int J Biochem Cell*  
423 *Biol* 36(7):1187-1205.
- 424 21. Lee Y, Rodriguez C, & Dionne RA (2005) The role of COX-2 in acute pain and the  
425 use of selective COX-2 inhibitors for acute pain relief. *Curr Pharm Des*  
426 11(14):1737-1755.
- 427 22. Wallace JL (2001) Prostaglandin biology in inflammatory bowel disease.  
428 *Gastroenterol Clin North Am* 30(4):971-980.
- 429 23. Tessner TG, Muhale F, Riehl TE, Anant S, & Stenson WF (2004) Prostaglandin  
430 E2 reduces radiation-induced epithelial apoptosis through a mechanism involving  
431 AKT activation and bax translocation. *J Clin Invest* 114(11):1676-1685.
- 432 24. Martin-Venegas R, Roig-Perez S, Ferrer R, & Moreno JJ (2006) Arachidonic acid  
433 cascade and epithelial barrier function during Caco-2 cell differentiation. *Journal*  
434 *of lipid research* 47(7):1416-1423.
- 435 25. Zamuner SR, Warriar N, Buret AG, MacNaughton WK, & Wallace JL (2003)  
436 Cyclooxygenase 2 mediates post-inflammatory colonic secretory and barrier  
437 dysfunction. *Gut* 52(12):1714-1720.
- 438 26. Hatazawa R, Ohno R, Tanigami M, Tanaka A, & Takeuchi K (2006) Roles of  
439 endogenous prostaglandins and cyclooxygenase isozymes in healing of  
440 indomethacin-induced small intestinal lesions in rats. *J Pharmacol Exp Ther*  
441 318(2):691-699.
- 442 27. Pavlidis P & Bjarnason I (2015) Aspirin Induced Adverse Effects on the Small and  
443 Large Intestine. *Curr Pharm Des* 21(35):5089-5093.
- 444 28. Xiaolun Sun KW, Raad Z. Gharaibeh, Josee Gauthier, Zhen He, Prabhanshu  
445 Tripathi, Dorina Avram, Steven Bruner, Anthony A. Fodor, Christian Jobin (2018)  
446 Microbiota-derived Metabolic Factors Reduce Campylobacteriosis in Mice.  
447 *Gastroenterology* In Press.
- 448 29. Royer C & Lu X (2011) Epithelial cell polarity: a major gatekeeper against cancer?  
449 *Cell death and differentiation* 18(9):1470-1477.
- 450 30. Xin ZS (1998) An Atlas of Histology. Chapter 10. Digestive System. (Springer), pp  
451 188-270.
- 452 31. Delgado ME, Grabinger T, & Brunner T (2016) Cell death at the intestinal epithelial  
453 front line. *The FEBS journal* 283(14):2701-2719.
- 454 32. Grant TD & Specian RD (2001) Epithelial cell dynamics in rabbit cecum and  
455 proximal colon P1. *The Anatomical record* 264(4):427-437.
- 456 33. Nielsen OH & Rask-Madsen J (1996) Mediators of inflammation in chronic  
457 inflammatory bowel disease. *Scandinavian journal of gastroenterology.*  
458 *Supplement* 216:149-159.
- 459 34. Sun X, Liu B, Sartor RB, & Jobin C (2013) Phosphatidylinositol 3-kinase-gamma  
460 signaling promotes Campylobacter jejuni-induced colitis through neutrophil  
461 recruitment in mice. *J Immunol* 190(1):357-365.
- 462 35. Sun X, Threadgill D, & Jobin C (2012) Campylobacter jejuni induces colitis through  
463 activation of mammalian target of rapamycin signaling. *Gastroenterology*  
464 142(1):86-95 e85.

- 465 36. Caly DL, D'Inca R, Auclair E, & Drider D (2015) Alternatives to Antibiotics to  
466 Prevent Necrotic Enteritis in Broiler Chickens: A Microbiologist's Perspective.  
467 *Frontiers in microbiology* 6:1336.
- 468 37. Chapman HD, *et al.* (2013) A selective review of advances in coccidiosis research.  
469 *Advances in parasitology* 83:93-171.
- 470 38. Abt MC, McKenney PT, & Pamer EG (2016) Clostridium difficile colitis:  
471 pathogenesis and host defence. *Nature reviews. Microbiology* 14(10):609-620.
- 472 39. Sorg JA & Sonenshein AL (2008) Bile salts and glycine as cogerminants for  
473 Clostridium difficile spores. *J Bacteriol* 190(7):2505-2512.
- 474 40. Long JR, Pettit JR, & Barnum DA (1974) Necrotic enteritis in broiler chickens. II.  
475 Pathology and proposed pathogenesis. *Canadian journal of comparative medicine :*  
476 *Revue canadienne de medecine comparee* 38(4):467-474.
- 477 41. Al-Sheikhly F & Truscott RB (1977) The pathology of necrotic enteritis of chickens  
478 following infusion of broth cultures of Clostridium perfringens into the duodenum.  
479 *Avian diseases* 21(2):230-240.
- 480 42. Sherman MA & Kalman D (2004) Initiation and resolution of mucosal inflammation.  
481 *Immunologic Research* 29(1):241.
- 482 43. Winter SE, *et al.* (2010) Gut inflammation provides a respiratory electron acceptor  
483 for Salmonella. *Nature* 467(7314):426-429.
- 484 44. Galarza-Seeber R, *et al.* (2016) Leaky Gut and Mycotoxins: Aflatoxin B1 Does Not  
485 Increase Gut Permeability in Broiler Chickens. *Front Vet Sci* 3:10.
- 486 45. Sun X & Jobin C (2014) Nucleotide-binding oligomerization domain-containing  
487 protein 2 controls host response to Campylobacter jejuni in Il10<sup>-/-</sup> mice. *J Infect*  
488 *Dis* 210(7):1145-1154.
- 489 46. Sangild PT, *et al.* (2006) Diet- and colonization-dependent intestinal dysfunction  
490 predisposes to necrotizing enterocolitis in preterm pigs. *Gastroenterology*  
491 130(6):1776-1792.

492

493

494 **Figure legends**

495

496 **Figure 1. DCA inhibits *C. perfringens* in vitro growth.** *C. perfringens* ( $10^3$  CFU) were  
497 inoculated into TSB supplemented with various concentrations of conjugated primary bile  
498 acid TCA, primary bile acid CA, and secondary bile acid DCA. (A) Image of bile acids did  
499 (clear broth) or did not (cloudy broth) inhibited *C. perfringens* growth. (B) OD600 reading  
500 of the broth in A. (C) Image of bile acids did not inhibit *C. perfringens* growth. (B) OD600  
501 reading of the broth in C. All graphs depict mean  $\pm$  SEM. Results are representative of 3  
502 independent experiments.

503

504 **Figure 2. DCA attenuates NE-induced productivity loss and histopathology.** Cohorts  
505 of 13 broiler chickens were fed basal, 1.5 g/kg CA, or DCA diets. The birds were infected  
506 with *E. maxima* and *C. perfringens* at 18 and 23 days of age, respectively. The birds were  
507 sacrificed at 26 days of age. (A) Bird growth performance of daily body weight gain. (B)  
508 H&E staining showing representative intestinal histology images. (C) Quantification of  
509 histological intestinal damage score. Scale bar is 200  $\mu$ m. All graphs depict mean  $\pm$  SEM.  
510 \*,  $P < 0.05$ ; \*\*,  $P < 0.01$ ; \*\*\*,  $P < 0.001$ . Results are representative of 3 independent  
511 experiments.

512

513 **Figure 3. DCA attenuates NE-induced intestinal cell death and apoptosis.** Cohorts  
514 of 13 broiler chickens were fed different diets and infected as in Figure 2. (A)  
515 Representative intestinal cell death (deviated nuclei) using H&E staining. (B)

516 Representative villus cell apoptosis (green) using TUNEL assay. Scale bar is 20  $\mu\text{m}$  (A)  
517 and 10  $\mu\text{m}$  (B). Results are representative of 3 independent experiments.

518

519 **Figure 4. DCA reduces *C. perfringens* invasion and inflammatory response.** Cohorts  
520 of 13 broiler chickens were fed different diets and infected as in Figure 2. (A) Luminal *C.*  
521 *perfringens* colonization level quantified by 16s RNA real-time PCR. (B) Presence of *C.*  
522 *perfringens* (red dots) in ileal sections of NE birds, detected using fluorescence in situ  
523 hybridization (FISH) assay. (C) Ileal *Infy*, *Litaf* (*Tnfa*), *Il1 $\beta$* , and *Mmp9* mRNA qPCR fold  
524 change relative to uninfected birds and normalized to *Gapdh*. All graphs depict mean  $\pm$   
525 SEM. NS, not significant; \*,  $P < 0.05$ . Results are representative of 3 independent  
526 experiments.

527

528 **Figure 5. COX inhibitor aspirin alleviates *C. perfringens*-induced inflammatory**  
529 **response in chicken splenocytes.** Splenocytes isolated from broiler chickens were  
530 infected with *C. perfringens* (MOI 100) for 4 hr or stimulated with murine  $\text{INF}\gamma$  (1  $\mu\text{g}/\text{ml}$ ) or  
531  $\text{TNF}\alpha$  (5  $\text{ng}/\text{ml}$ ) for 2 hr in the presence of 1.2 mM aspirin. RNA was extracted, reverse-  
532 transcribed, and quantified using a Bio-Rad 384 PCR platform. (A) *Infy*, *Litaf*, *Il1 $\beta$* , *Mmp9*,  
533 and *Ptgs2* mRNA fold change normalized to *Gapdh*. (B) Gene expression fold change in  
534 the presence of  $\text{INF}\gamma$  and aspirin. (C) Gene expression fold change in the presence of  
535  $\text{TNF}\alpha$  and aspirin. All graphs depict mean  $\pm$  SEM. \*,  $P < 0.05$ ; \*\*\*,  $P < 0.001$ . Results are  
536 representative of 3 independent experiments.

537



538 **Figure 6. Aspirin attenuates NE-induced productivity loss, histopathology, and**  
539 **apoptosis.** Cohorts of 13 broiler chickens were fed basal and 0.12 g/kg aspirin diet. The  
540 birds were infected and sampled as in figure 1. (A) Bird growth performance of daily body  
541 weight gain. (B) H&E staining showing representative intestinal histology images. (C)  
542 Quantification of histological intestinal damage score. (D) Representative cell apoptosis  
543 (green) using TUNEL assay. Scale bar is 200  $\mu\text{m}$  in B and 10  $\mu\text{m}$  in C. All graphs depict  
544 mean  $\pm$  SEM. \*,  $P < 0.05$ ; \*\*,  $P < 0.01$ ; \*\*\*,  $P < 0.001$ . Results are representative of 2  
545 independent experiments.

# Figure 1. Deoxycholic acid (DCA) inhibits *C. perfringens* in vitro growth

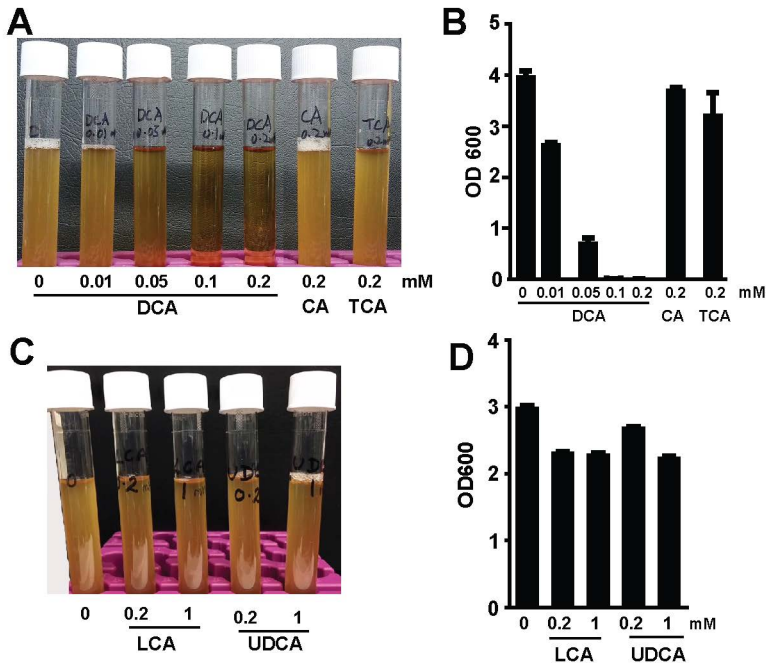

# Figure 2. DCA attenuates NE-induced productivity loss and histopathology

**A**

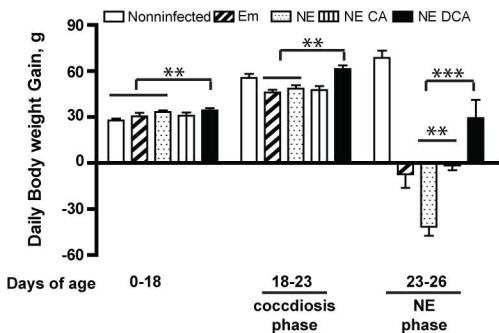

**B**

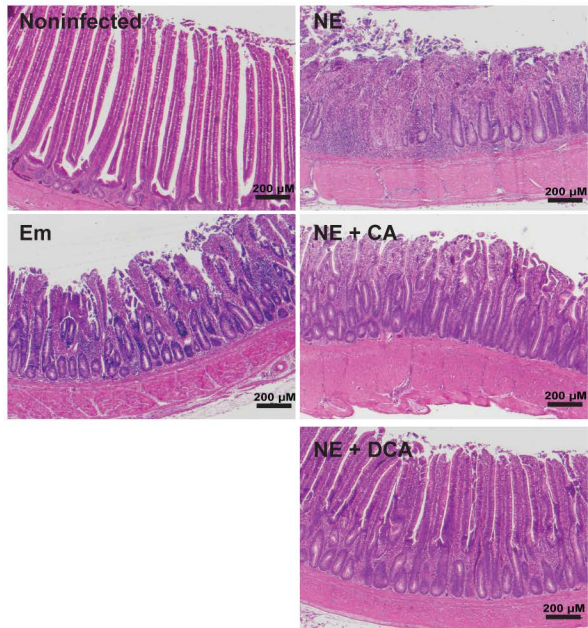

**C**

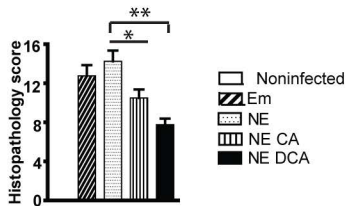

# Figure 3. DCA attenuates NE-induced intestinal cell necrosis and apoptosis

**A**

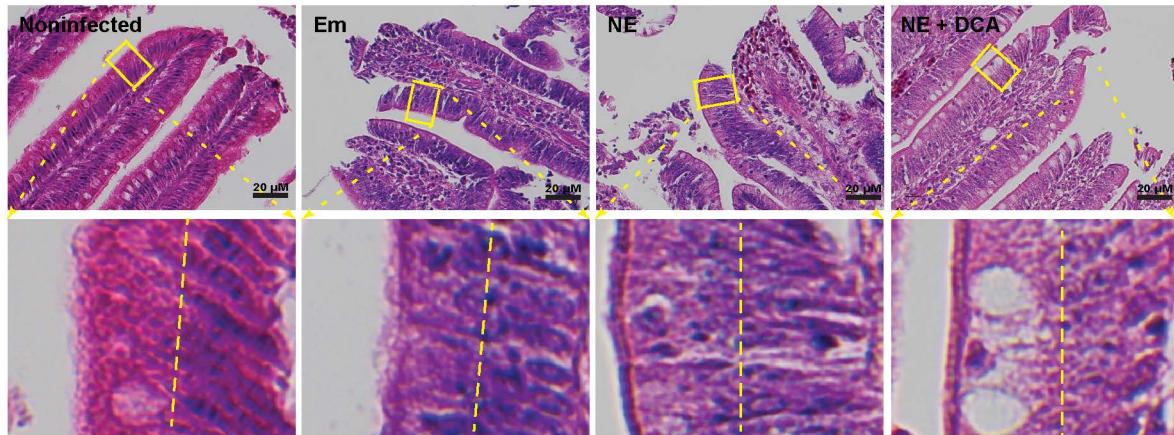

**B**

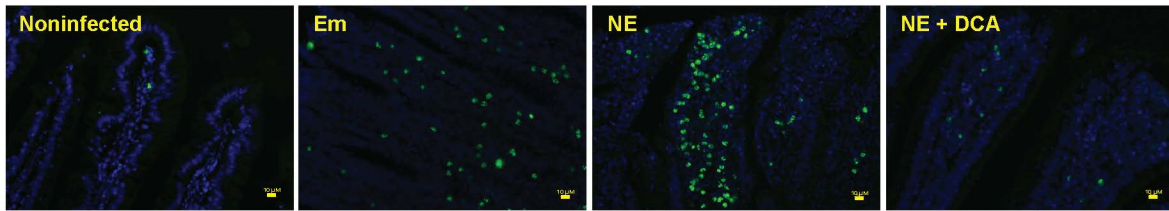

# Figure 4. DCA reduces *C. perfringens* invasion and inflammatory response

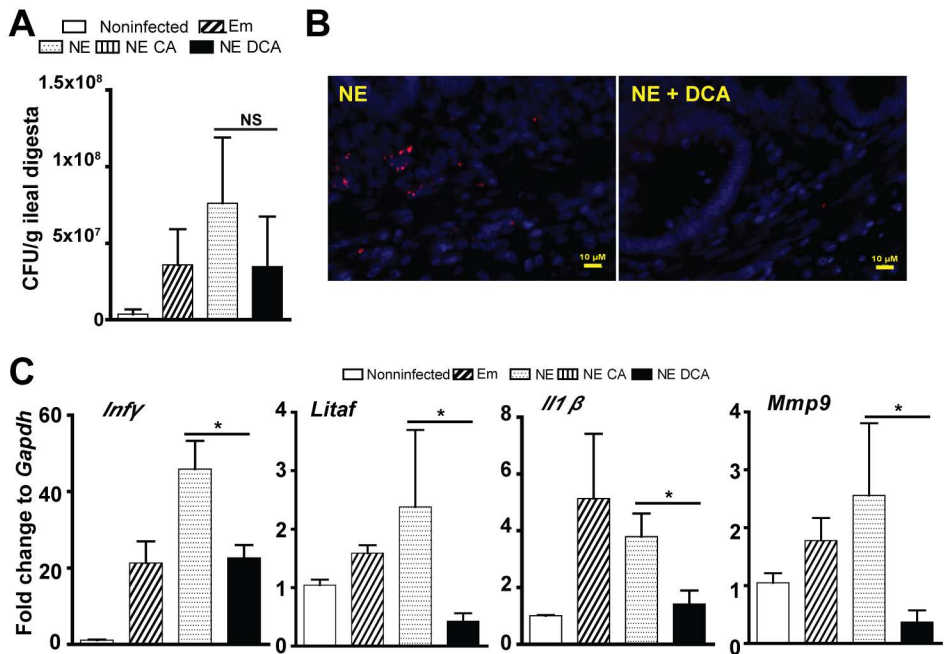

# Figure 5. COX inhibitor Aspirin alleviates *C. perfringens*-induced inflammatory response in splenocytes

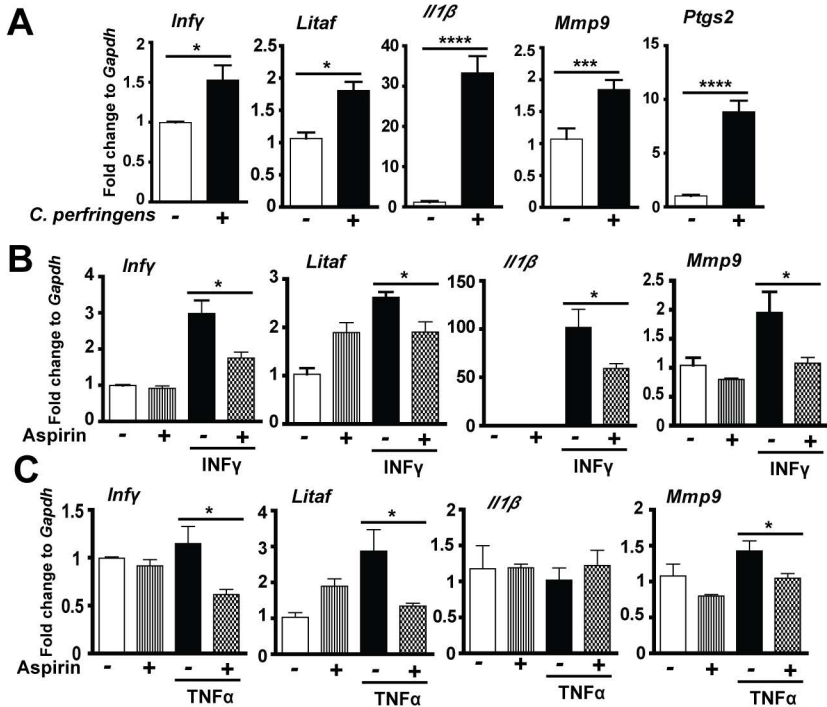

# Figure 6. Aspirin attenuates NE-induced productivity loss, histopathology and apoptosis

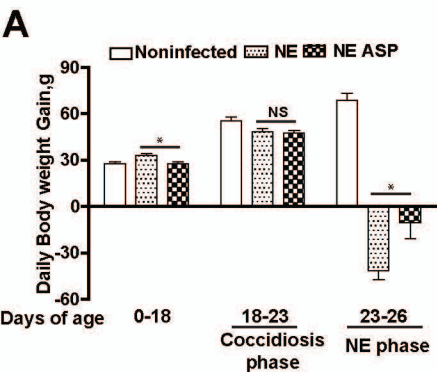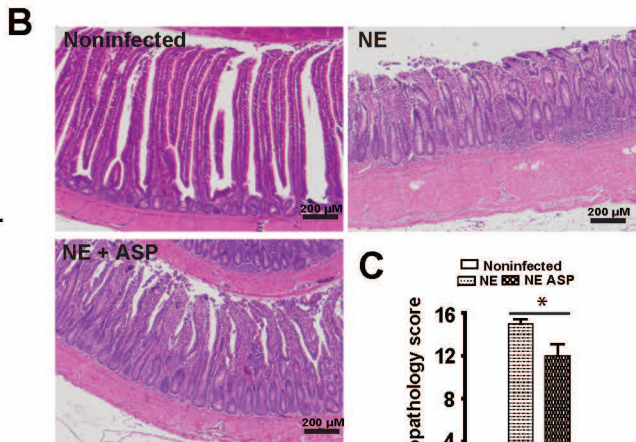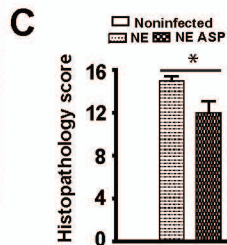

**D**

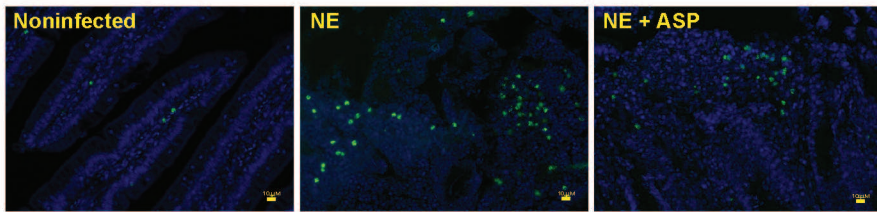

Source: https://www.biorxiv.org/content/10.1101/215640v3.full.pdf
